# Supplementary material for: Design Features in Multiple Generations of Electronic Cigarette Atomizers
Source: PubMed Central journal article supplement (PMC6720609; doi:10.3390/ijerph16162904), 2019-08-14
Supplement: ijerph-16-02904-s001.pdf [file ijerph-16-02904-s001.pdf]

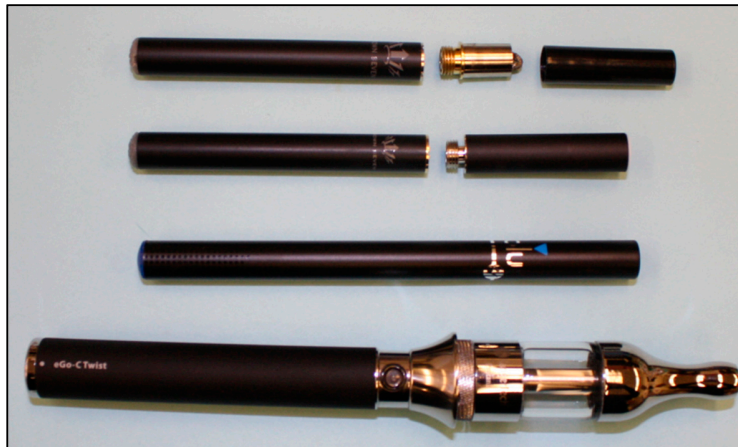

**Figure S1. Layout of each generation of EC.** (Top to bottom) 3- piece cartridge style, 2-piece cartomizer style, 1-piece disposable style, and tank style.

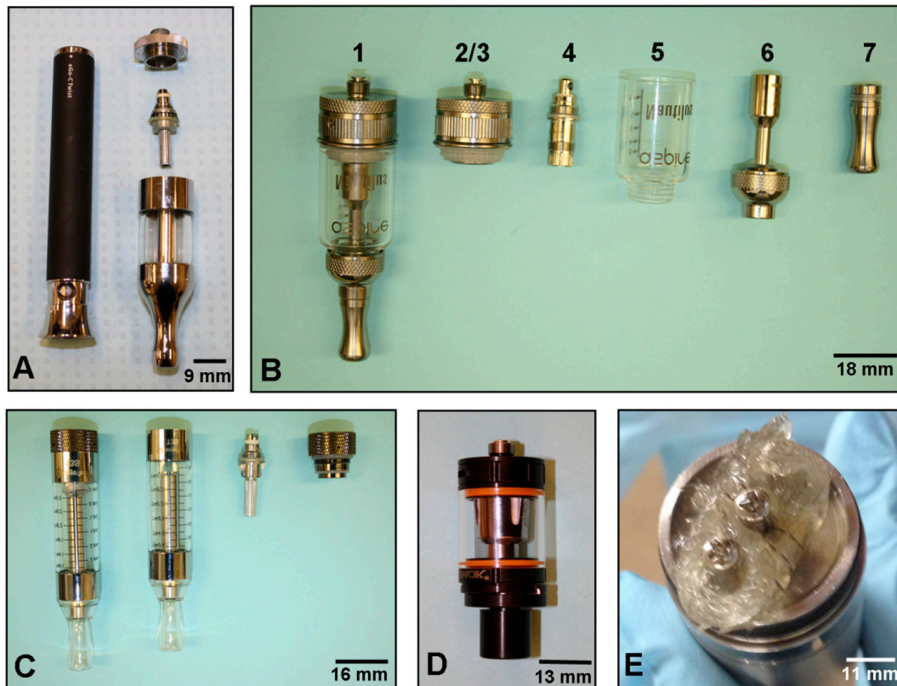

**Figure S2. Anatomy of various tank style EC.** A. Disassembled Kangertech Protank with associated coil and bottom hardware. B. Disassembled Aspire Nautilus tank and associated components: 1= fully assembled Aspire tank, 2/3 = bottom hardware and air-flow adjustment ring, 4 = replaceable atomizer/coil, 5 = Pyrex glass tank, 6 = upper hardware, 7 = drip tip/ mouthpiece. C. Disassembled Kanger T3S tank with associated coil and bottom hardware. D. Detail of fully assembled Smok tank. E. Anatomy of an unused Clone atomizer saturated with refill fluid.

Supplemental Table 1: List of EC products used in study

| <b>Brand</b>              | <b>EC style</b> | <b>Description of EC</b> | <b>Battery Type</b>              | <b>Generation</b> |
|---------------------------|-----------------|--------------------------|----------------------------------|-------------------|
| BluCig (2012)             | Cartomizer      | Cig-a-like               | Fixed low voltage                | First             |
| BluCig Plus (2017)        | Cartomizer      | Cig-a-like               | Fixed low voltage                | First             |
| V2 Cigs (2012)            | Cartomizer      | Cig-a-like               | Fixed low voltage                | First             |
| V2 Cig (2017)             | Cartomizer      | Cig-a-like               | Fixed low voltage                | First             |
| Mark Ten (2014)           | Cartomizer      | Cig-a-like               | Fixed low voltage                | First             |
| Mark Ten XL (2017)        | Cartomizer      | Cig-a-like               | Fixed low voltage                | First             |
| Vuse (2014)               | Cartomizer      | Cig-a-like               | Fixed low voltage                | First             |
| Vuse Vibe (2017)          | Cartomizer      | Cig-a-like               | Fixed low voltage                | First             |
| Greensmoke (2012)         | Cartomizer      | Cig-a-like               | Fixed low voltage                | First             |
| NJOY NPRO (2013)          | Cartomizer      | Cig-a-like               | Fixed low voltage                | First             |
| NJOY NPRO (2011)          | Cartomizer      | Cig-a-like               | Fixed low voltage                | First             |
| SB Smoke (2012)           | Cartomizer      | Cig-a-like               | Fixed low voltage                | First             |
| Crown 7 Imperial (2012)   | Cartomizer      | Cig-a-like               | Fixed low voltage                | First             |
| LS Eagle (2012)           | Cartomizer      | Cig-a-like               | Fixed low voltage                | First             |
| SafeCig (2012)            | Cartomizer      | Cig-a-like               | Fixed low voltage                | First             |
| Smoke 51 (2012)           | Cartomizer      | Cig-a-like               | Fixed low voltage                | First             |
| SE Platinum (2011)        | Cartomizer      | Cig-a-like               | Fixed low voltage                | First             |
| BluCig (2014)             | Disposable      | Cig-a-like               | Fixed low voltage                | First             |
| Mistic (2014)             | Disposable      | Cig-a-like               | Fixed low voltage                | First             |
| NJOY King (2014)          | Disposable      | Cig-a-like               | Fixed low voltage                | First             |
| Square 82 (2014)          | Disposable      | Cig-a-like               | Fixed low voltage                | First             |
| V2 Cigs (2012)            | Disposable      | Cig-a-like               | Fixed low voltage                | First             |
| Vype (2012)               | Disposable      | Cig-a-like               | Fixed low voltage                | First             |
| Imperial Hookah (2014)    | Disposable      | Cig-a-like               | Fixed low voltage                | First             |
| Luxury Lites (2014)       | Disposable      | Cig-a-like               | Fixed low voltage                | First             |
| Smooth (2014)             | Disposable      | Cig-a-like               | Fixed low voltage                | First             |
| Starbuzz (2014)           | Disposable      | Cig-a-like               | Fixed low voltage                | First             |
| Tsunami (2014)            | Disposable      | Cig-a-like               | Fixed low voltage                | First             |
| Kangertech Protank (2014) | Tank            | Clearomizer              | Variable voltage pen style       | Second            |
| Nautilus Aspire (2014)    | Tank            | Hybrid Clearomizer/Mod   | Variable voltage en pen style    | Second/Third      |
| Kanger T3S (2014)         | Tank            | Hybrid Clearomizer/Mod   | Variable voltage, wattage, power | Second/Third      |
| Clone(2014)               | Tank            | Mod/RDA                  | Fixed voltage                    | Third             |
| Smok (2017)               | Tank            | Mod/Sub-ohm              | Variable voltage, wattage, power | Third             |
| Tsunami 2.4 (2017)        | Tank            | Mod/RDA                  | Variable voltage, wattage, power | Third             |
